# Supplementary material for: Comparison of prediction power of three multivariate calibrations for estimation of leaf anthocyanin content with visible spectroscopy in Prunus cerasifera
Source: PeerJ. 2019 Oct 31;7:e7997. doi: 10.7717/peerj.7997 (PMC6825749; doi:10.7717/peerj.7997)
Supplement: Supplemental Information 1 [file peerj-07-7997-s001.xlsx]

## Sheet: Sheet1
	Sample number	Wavelenth(nm)
		450	451	452	453	454	455	456	457	458	459	460	461	462	463	464	465	466	467	468	469	470	471	472	473	474	475	476	477	478	479	480	481	482	483	484	485	486	487	488	489	490	491	492	493	494	495	496	497
Validation set	1	0.0392	0.0391	0.0391	0.0391	0.0392	0.0392	0.0392	0.0392	0.0392	0.0392	0.0391	0.0391	0.039	0.039	0.039	0.039	0.0389	0.0389	0.0388	0.0388	0.0387	0.0387	0.0386	0.0385	0.0385	0.0385	0.0385	0.0385	0.0385	0.0384	0.0383	0.0383	0.0383	0.0382	0.0382	0.0381	0.0381	0.0381	0.0381	0.0381	0.0382	0.0382	0.0382	0.0382	0.0382	0.0381	0.0382	0.0382
	2	0.0404	0.0405	0.0405	0.0405	0.0405	0.0405	0.0405	0.0406	0.0406	0.0406	0.0406	0.0406	0.0406	0.0406	0.0405	0.0405	0.0404	0.0403	0.0403	0.0403	0.0404	0.0404	0.0404	0.0404	0.0404	0.0404	0.0404	0.0404	0.0404	0.0404	0.0404	0.0405	0.0405	0.0405	0.0406	0.0406	0.0407	0.0407	0.0408	0.0409	0.041	0.0411	0.0414	0.0416	0.0418	0.042	0.0423	0.0425
	3	0.0414	0.0416	0.0418	0.042	0.0422	0.0422	0.0422	0.0422	0.0422	0.0423	0.0424	0.0424	0.0424	0.0424	0.0424	0.0424	0.0423	0.0423	0.0423	0.0422	0.0421	0.042	0.0421	0.0421	0.0422	0.0423	0.0423	0.0423	0.0424	0.0424	0.0424	0.0424	0.0425	0.0425	0.0426	0.0426	0.0427	0.0428	0.0431	0.0433	0.0435	0.0438	0.044	0.0443	0.0446	0.0449	0.0452	0.0456
	4	0.048	0.0481	0.0483	0.0485	0.0485	0.0486	0.0486	0.0486	0.0487	0.0487	0.0488	0.0488	0.0489	0.0489	0.0489	0.0489	0.0489	0.0489	0.0488	0.0488	0.0488	0.0488	0.0488	0.0488	0.0488	0.0489	0.0489	0.049	0.0491	0.0492	0.0493	0.0494	0.0495	0.0496	0.0497	0.0498	0.0501	0.0503	0.0506	0.0509	0.0513	0.0516	0.0521	0.0527	0.0532	0.0538	0.0544	0.055
	5	0.0383	0.0382	0.0383	0.0383	0.0384	0.0383	0.0383	0.0383	0.0382	0.0382	0.0382	0.0381	0.0382	0.0382	0.0383	0.0382	0.0381	0.038	0.038	0.038	0.0381	0.0381	0.0381	0.0381	0.038	0.038	0.038	0.0381	0.0381	0.0382	0.0383	0.0383	0.0383	0.0382	0.0382	0.0383	0.0383	0.0383	0.0383	0.0384	0.0385	0.0387	0.0389	0.0391	0.0392	0.0394	0.0397	0.0399
	6	0.0362	0.0363	0.0364	0.0364	0.0363	0.0361	0.0361	0.0362	0.0362	0.0361	0.036	0.036	0.0361	0.0361	0.0361	0.0361	0.036	0.036	0.036	0.0359	0.0359	0.0359	0.0359	0.0359	0.0359	0.0359	0.036	0.0359	0.0359	0.036	0.036	0.0361	0.0361	0.0361	0.0361	0.0361	0.036	0.036	0.036	0.0361	0.0362	0.0363	0.0366	0.0367	0.0369	0.037	0.0372	0.0374
	7	0.0353	0.0353	0.0352	0.0352	0.0353	0.0353	0.0352	0.0352	0.0352	0.0352	0.0351	0.0351	0.0351	0.035	0.035	0.0349	0.0349	0.0349	0.0349	0.0349	0.0349	0.0349	0.0348	0.0348	0.0349	0.0349	0.0349	0.0349	0.0348	0.0348	0.0349	0.035	0.0351	0.0351	0.035	0.0349	0.0349	0.0348	0.0348	0.0349	0.035	0.0351	0.0352	0.0354	0.0355	0.0357	0.0358	0.036
	8	0.0402	0.0403	0.0403	0.0403	0.0403	0.0402	0.0402	0.0401	0.0402	0.0402	0.0401	0.0402	0.0402	0.0402	0.0402	0.0402	0.0402	0.0402	0.0402	0.0401	0.0401	0.04	0.0401	0.0402	0.0402	0.0403	0.0404	0.0404	0.0405	0.0406	0.0407	0.0408	0.0408	0.0409	0.0409	0.041	0.041	0.041	0.0412	0.0413	0.0415	0.0418	0.042	0.0423	0.0427	0.043	0.0434	0.0437
	9	0.042	0.0421	0.0421	0.0421	0.0421	0.0421	0.042	0.042	0.0419	0.0419	0.0419	0.0418	0.0418	0.0419	0.0419	0.0418	0.0418	0.0418	0.0418	0.0418	0.0418	0.0418	0.0418	0.0418	0.0418	0.0419	0.0419	0.0419	0.0419	0.042	0.0421	0.0422	0.0423	0.0424	0.0424	0.0423	0.0423	0.0423	0.0424	0.0426	0.0427	0.0429	0.0432	0.0434	0.0436	0.0439	0.0443	0.0446
	10	0.0395	0.0396	0.0396	0.0396	0.0395	0.0394	0.0393	0.0393	0.0394	0.0394	0.0394	0.0393	0.0392	0.0392	0.0391	0.0392	0.0392	0.0392	0.0391	0.039	0.0389	0.0389	0.0388	0.0388	0.0388	0.0388	0.0387	0.0386	0.0385	0.0386	0.0386	0.0387	0.0386	0.0386	0.0386	0.0385	0.0384	0.0384	0.0383	0.0383	0.0384	0.0384	0.0385	0.0385	0.0386	0.0386	0.0386	0.0387
	11	0.0421	0.0423	0.0423	0.0423	0.0425	0.0424	0.0424	0.0424	0.0425	0.0425	0.0425	0.0425	0.0425	0.0425	0.0426	0.0425	0.0424	0.0425	0.0425	0.0425	0.0425	0.0426	0.0426	0.0426	0.0426	0.0427	0.0428	0.0428	0.0429	0.043	0.0432	0.0434	0.0436	0.0437	0.0438	0.044	0.0442	0.0444	0.0446	0.0449	0.0453	0.0458	0.0464	0.0469	0.0475	0.0482	0.0488	0.0494
	12	0.0384	0.0387	0.0389	0.039	0.0391	0.0391	0.0391	0.0391	0.0391	0.0391	0.039	0.039	0.039	0.0391	0.0391	0.0392	0.0392	0.0392	0.0392	0.0392	0.0392	0.0391	0.0391	0.0391	0.0392	0.0392	0.0393	0.0394	0.0395	0.0396	0.0398	0.04	0.0401	0.0402	0.0403	0.0404	0.0405	0.0407	0.0409	0.0413	0.0417	0.0421	0.0426	0.0431	0.0437	0.0443	0.0448	0.0454
	13	0.0409	0.041	0.0413	0.0415	0.0416	0.0415	0.0415	0.0414	0.0414	0.0414	0.0414	0.0414	0.0415	0.0415	0.0416	0.0416	0.0415	0.0415	0.0415	0.0415	0.0415	0.0415	0.0415	0.0415	0.0416	0.0417	0.0418	0.0419	0.042	0.0421	0.0423	0.0425	0.0427	0.0428	0.043	0.0431	0.0432	0.0433	0.0435	0.0438	0.0442	0.0447	0.0453	0.0458	0.0464	0.047	0.0477	0.0484
	14	0.0448	0.045	0.0453	0.0454	0.0456	0.0456	0.0457	0.0457	0.0458	0.0458	0.0458	0.0458	0.0459	0.046	0.0461	0.0462	0.0461	0.046	0.046	0.046	0.0461	0.046	0.046	0.0461	0.0461	0.046	0.0459	0.046	0.0462	0.0465	0.0467	0.047	0.0472	0.0473	0.0475	0.0477	0.048	0.0484	0.0488	0.0493	0.0498	0.0504	0.0512	0.0521	0.053	0.054	0.0549	0.0557
	15	0.0391	0.0393	0.0393	0.0394	0.0394	0.0393	0.0392	0.0392	0.0392	0.0392	0.0391	0.039	0.039	0.0391	0.0392	0.0392	0.0392	0.0392	0.0391	0.0392	0.0392	0.0391	0.0391	0.0391	0.0392	0.0392	0.0392	0.0392	0.0393	0.0394	0.0396	0.0399	0.04	0.0401	0.0402	0.0401	0.0401	0.04	0.0402	0.0403	0.0405	0.0408	0.0413	0.0417	0.0421	0.0426	0.043	0.0434
	16	0.0513	0.0518	0.052	0.0522	0.0523	0.0523	0.0523	0.0523	0.0523	0.0523	0.0523	0.0523	0.0523	0.0523	0.0524	0.0525	0.0525	0.0525	0.0524	0.0523	0.0523	0.0523	0.0524	0.0525	0.0525	0.0525	0.0526	0.0527	0.053	0.0535	0.0539	0.0544	0.0547	0.0549	0.0551	0.0552	0.0554	0.0556	0.0559	0.0565	0.0572	0.058	0.059	0.0602	0.0613	0.0626	0.0638	0.0651
	17	0.0509	0.0514	0.0518	0.052	0.052	0.052	0.052	0.0521	0.052	0.0519	0.0518	0.0518	0.0519	0.052	0.0522	0.0523	0.0524	0.0523	0.0522	0.0521	0.0521	0.052	0.0521	0.0521	0.0522	0.0523	0.0524	0.0525	0.0528	0.0533	0.0537	0.0542	0.0545	0.0547	0.0548	0.0549	0.0551	0.0553	0.0557	0.0563	0.0569	0.0577	0.0587	0.0599	0.061	0.0622	0.0634	0.0646
	18	0.0429	0.0431	0.0433	0.0434	0.0434	0.0433	0.0432	0.0431	0.0431	0.0431	0.0431	0.043	0.043	0.0431	0.0431	0.0432	0.0433	0.0433	0.0432	0.0432	0.0431	0.043	0.043	0.043	0.0431	0.0431	0.0431	0.0431	0.0433	0.0436	0.0438	0.0441	0.0443	0.0443	0.0444	0.0443	0.0443	0.0444	0.0445	0.0448	0.0452	0.0456	0.0461	0.0467	0.0473	0.0479	0.0485	0.049
	19	0.0383	0.0385	0.0385	0.0385	0.0384	0.0383	0.0382	0.0382	0.0381	0.038	0.0379	0.0379	0.0379	0.0379	0.038	0.038	0.038	0.038	0.0379	0.0378	0.0377	0.0377	0.0377	0.0377	0.0376	0.0376	0.0375	0.0374	0.0374	0.0376	0.0378	0.0379	0.0379	0.038	0.038	0.0379	0.0378	0.0377	0.0376	0.0376	0.0377	0.0379	0.0381	0.0384	0.0386	0.0389	0.0391	0.0393
	20	0.0415	0.0418	0.0418	0.0418	0.0417	0.0415	0.0414	0.0413	0.0412	0.0411	0.041	0.041	0.041	0.0411	0.0412	0.0413	0.0413	0.0412	0.0411	0.041	0.0409	0.0409	0.0408	0.0408	0.0409	0.0408	0.0407	0.0406	0.0407	0.0408	0.041	0.0413	0.0414	0.0414	0.0413	0.0412	0.0411	0.041	0.0409	0.041	0.0411	0.0414	0.0416	0.0419	0.0423	0.0426	0.0429	0.043
	21	0.0372	0.0375	0.0376	0.0376	0.0377	0.0375	0.0374	0.0374	0.0373	0.0372	0.0371	0.0372	0.0372	0.0373	0.0373	0.0374	0.0374	0.0374	0.0374	0.0373	0.0373	0.0373	0.0373	0.0372	0.0371	0.0371	0.037	0.037	0.0371	0.0373	0.0376	0.0379	0.038	0.0381	0.038	0.038	0.0379	0.0379	0.038	0.0381	0.0384	0.0387	0.0391	0.0395	0.0399	0.0405	0.0408	0.0412
	22	0.0411	0.041	0.041	0.041	0.041	0.041	0.0409	0.0408	0.0409	0.0409	0.041	0.0411	0.0411	0.041	0.0409	0.0408	0.0408	0.0408	0.0408	0.0408	0.0409	0.0409	0.0409	0.041	0.041	0.0409	0.041	0.0412	0.0413	0.0413	0.0413	0.0413	0.0413	0.0413	0.0414	0.0415	0.0416	0.0417	0.0418	0.0419	0.0421	0.0423	0.0426	0.0429	0.0432	0.0435	0.0438	0.0442
	23	0.0359	0.036	0.036	0.036	0.036	0.0361	0.0362	0.0362	0.0362	0.0362	0.0362	0.0362	0.0362	0.0362	0.0361	0.0362	0.0363	0.0363	0.0363	0.0362	0.0362	0.0361	0.0362	0.0363	0.0364	0.0365	0.0366	0.0367	0.0369	0.037	0.0371	0.0373	0.0374	0.0374	0.0375	0.0376	0.0378	0.038	0.0383	0.0386	0.0391	0.0395	0.04	0.0405	0.0411	0.0416	0.0422	0.0429
	24	0.0431	0.0431	0.043	0.0429	0.0429	0.0429	0.0428	0.0428	0.0429	0.0429	0.0429	0.0429	0.0429	0.0429	0.043	0.0429	0.0428	0.0428	0.0427	0.0427	0.0428	0.0428	0.0428	0.0429	0.043	0.0431	0.0431	0.0431	0.0431	0.0432	0.0433	0.0433	0.0434	0.0435	0.0436	0.0437	0.0438	0.0439	0.044	0.0442	0.0444	0.0448	0.0451	0.0455	0.0459	0.0463	0.0466	0.047
	25	0.0385	0.0385	0.0386	0.0386	0.0386	0.0386	0.0386	0.0387	0.0387	0.0386	0.0386	0.0385	0.0385	0.0384	0.0384	0.0384	0.0384	0.0383	0.0383	0.0383	0.0382	0.0382	0.0382	0.0382	0.0382	0.0382	0.0382	0.0383	0.0383	0.0383	0.0383	0.0383	0.0383	0.0383	0.0383	0.0382	0.0383	0.0383	0.0384	0.0384	0.0385	0.0387	0.0388	0.039	0.0392	0.0393	0.0395	0.0397
	26	0.0412	0.0412	0.0412	0.0413	0.0414	0.0413	0.0413	0.0413	0.0413	0.0413	0.0412	0.0412	0.0412	0.0411	0.0411	0.0411	0.0411	0.041	0.041	0.0409	0.0409	0.0408	0.0408	0.0409	0.0409	0.0409	0.0409	0.0409	0.0409	0.041	0.041	0.041	0.041	0.0409	0.0409	0.0409	0.0409	0.041	0.041	0.0411	0.0412	0.0413	0.0414	0.0415	0.0417	0.0419	0.042	0.0423
	27	0.0397	0.0397	0.0398	0.0398	0.0397	0.0397	0.0397	0.0397	0.0397	0.0397	0.0397	0.0396	0.0396	0.0395	0.0395	0.0395	0.0394	0.0394	0.0394	0.0393	0.0392	0.0392	0.0392	0.0392	0.0393	0.0392	0.0392	0.0392	0.0392	0.0392	0.0392	0.0391	0.0391	0.0391	0.0391	0.0391	0.0391	0.0391	0.0392	0.0393	0.0393	0.0394	0.0395	0.0396	0.0397	0.0399	0.0401	0.0403
	28	0.0404	0.0405	0.0405	0.0406	0.0407	0.0406	0.0406	0.0406	0.0406	0.0406	0.0405	0.0405	0.0404	0.0404	0.0403	0.0404	0.0404	0.0404	0.0403	0.0403	0.0403	0.0402	0.0402	0.0403	0.0403	0.0404	0.0404	0.0404	0.0404	0.0405	0.0405	0.0406	0.0406	0.0406	0.0406	0.0405	0.0406	0.0406	0.0407	0.0408	0.041	0.0411	0.0413	0.0415	0.0417	0.0419	0.0421	0.0424
	29	0.0349	0.0349	0.0349	0.0349	0.0349	0.0349	0.0349	0.0349	0.0349	0.0349	0.0348	0.0348	0.0348	0.0347	0.0347	0.0347	0.0347	0.0346	0.0346	0.0345	0.0345	0.0344	0.0344	0.0344	0.0344	0.0344	0.0344	0.0344	0.0343	0.0343	0.0343	0.0342	0.0342	0.0342	0.0341	0.0341	0.0341	0.0341	0.0342	0.0342	0.0342	0.0342	0.0342	0.0343	0.0343	0.0344	0.0345	0.0346
	30	0.0369	0.0369	0.037	0.037	0.0369	0.0369	0.0369	0.0368	0.0368	0.0368	0.0368	0.0368	0.0368	0.0368	0.0367	0.0366	0.0366	0.0366	0.0365	0.0364	0.0364	0.0365	0.0365	0.0365	0.0365	0.0365	0.0365	0.0365	0.0364	0.0365	0.0365	0.0364	0.0364	0.0364	0.0364	0.0364	0.0364	0.0365	0.0364	0.0365	0.0365	0.0366	0.0367	0.0368	0.0369	0.0371	0.0373	0.0374
	31	0.0378	0.0379	0.0379	0.0378	0.0378	0.0378	0.0378	0.0378	0.0379	0.0379	0.0379	0.0378	0.0377	0.0377	0.0376	0.0375	0.0375	0.0375	0.0374	0.0374	0.0374	0.0374	0.0375	0.0375	0.0374	0.0374	0.0374	0.0374	0.0373	0.0373	0.0374	0.0373	0.0373	0.0373	0.0374	0.0374	0.0374	0.0373	0.0373	0.0373	0.0373	0.0374	0.0375	0.0376	0.0378	0.0379	0.0381	0.0382
	32	0.04	0.0402	0.0402	0.0402	0.0402	0.0403	0.0403	0.0402	0.0402	0.0401	0.0401	0.0401	0.04	0.0401	0.0401	0.0401	0.04	0.0399	0.0398	0.0398	0.0398	0.0397	0.0398	0.0398	0.0398	0.0398	0.0398	0.0397	0.0398	0.0398	0.0398	0.0398	0.0398	0.0398	0.0398	0.0398	0.0399	0.0399	0.04	0.0401	0.0401	0.0402	0.0404	0.0406	0.0409	0.0411	0.0413	0.0416
	33	0.0398	0.0397	0.0398	0.0398	0.0399	0.0398	0.0398	0.0398	0.0397	0.0397	0.0397	0.0396	0.0396	0.0396	0.0396	0.0395	0.0394	0.0394	0.0393	0.0393	0.0393	0.0393	0.0392	0.0392	0.0392	0.0392	0.0392	0.0392	0.0391	0.0391	0.039	0.039	0.0391	0.0391	0.0392	0.0391	0.0391	0.039	0.039	0.039	0.0391	0.0391	0.0392	0.0393	0.0394	0.0395	0.0397	0.0398
	34	0.0383	0.0383	0.0382	0.0382	0.0382	0.0383	0.0383	0.0383	0.0383	0.0382	0.0381	0.0381	0.038	0.0379	0.0379	0.0379	0.038	0.0379	0.0379	0.0378	0.0378	0.0378	0.0378	0.0378	0.0378	0.0377	0.0377	0.0378	0.0378	0.0379	0.0379	0.0379	0.0378	0.0378	0.0378	0.0378	0.0378	0.0378	0.0378	0.0378	0.0379	0.038	0.0381	0.0382	0.0383	0.0384	0.0385	0.0387
	35	0.0356	0.0356	0.0357	0.0358	0.0359	0.0358	0.0358	0.0358	0.0357	0.0356	0.0356	0.0356	0.0356	0.0356	0.0355	0.0356	0.0356	0.0355	0.0355	0.0354	0.0354	0.0354	0.0354	0.0354	0.0354	0.0354	0.0354	0.0354	0.0354	0.0354	0.0354	0.0355	0.0355	0.0356	0.0355	0.0355	0.0355	0.0355	0.0355	0.0356	0.0358	0.0358	0.036	0.0361	0.0363	0.0364	0.0366	0.0368
	36	0.0376	0.0377	0.0378	0.0379	0.0379	0.0379	0.0379	0.0379	0.0378	0.0378	0.0378	0.0378	0.0378	0.0377	0.0377	0.0377	0.0377	0.0376	0.0376	0.0376	0.0376	0.0375	0.0375	0.0375	0.0375	0.0375	0.0375	0.0375	0.0374	0.0375	0.0375	0.0375	0.0375	0.0376	0.0376	0.0375	0.0375	0.0376	0.0376	0.0377	0.0378	0.0379	0.0381	0.0382	0.0384	0.0386	0.0388	0.039
	37	0.0378	0.0379	0.0379	0.038	0.038	0.0379	0.0379	0.0378	0.0378	0.0378	0.0378	0.0378	0.0378	0.0378	0.0377	0.0377	0.0377	0.0377	0.0376	0.0375	0.0375	0.0375	0.0375	0.0376	0.0376	0.0375	0.0375	0.0374	0.0374	0.0374	0.0375	0.0375	0.0375	0.0376	0.0376	0.0376	0.0376	0.0376	0.0376	0.0377	0.0377	0.0378	0.038	0.0382	0.0384	0.0387	0.0389	0.0392
	38	0.0382	0.0383	0.0384	0.0385	0.0385	0.0384	0.0383	0.0382	0.0383	0.0383	0.0383	0.0382	0.0382	0.0382	0.0381	0.0381	0.0381	0.038	0.038	0.038	0.038	0.0379	0.0379	0.0379	0.0379	0.0379	0.0378	0.0378	0.0378	0.0378	0.0378	0.0378	0.0379	0.0379	0.038	0.0379	0.0379	0.0379	0.0378	0.0379	0.0379	0.038	0.0381	0.0383	0.0384	0.0385	0.0387	0.0389
Calibration set	39	0.0393	0.0393	0.0392	0.0392	0.0392	0.0393	0.0393	0.0393	0.0392	0.0392	0.0391	0.0391	0.039	0.039	0.039	0.0389	0.0389	0.0388	0.0388	0.0387	0.0387	0.0387	0.0386	0.0385	0.0385	0.0385	0.0385	0.0386	0.0385	0.0385	0.0384	0.0384	0.0383	0.0383	0.0382	0.0381	0.0381	0.0381	0.0381	0.0381	0.0382	0.0382	0.0382	0.0382	0.0382	0.0382	0.0382	0.0383
	40	0.0428	0.0429	0.0428	0.0428	0.0428	0.0428	0.0428	0.0427	0.0428	0.0428	0.0427	0.0427	0.0427	0.0427	0.0426	0.0425	0.0425	0.0425	0.0424	0.0424	0.0424	0.0423	0.0423	0.0423	0.0423	0.0423	0.0423	0.0422	0.0423	0.0423	0.0422	0.0422	0.0421	0.0421	0.0421	0.042	0.0421	0.0421	0.0421	0.0422	0.0422	0.0422	0.0424	0.0424	0.0425	0.0425	0.0425	0.0426
	41	0.0442	0.0442	0.0443	0.0443	0.0444	0.0445	0.0445	0.0444	0.0444	0.0444	0.0444	0.0442	0.0441	0.0441	0.0442	0.0442	0.0441	0.0441	0.044	0.0439	0.0438	0.0437	0.0437	0.0437	0.0437	0.0436	0.0436	0.0436	0.0436	0.0436	0.0436	0.0436	0.0435	0.0434	0.0434	0.0433	0.0434	0.0434	0.0434	0.0435	0.0435	0.0435	0.0437	0.0438	0.0439	0.044	0.044	0.0441
	42	0.044	0.044	0.044	0.0441	0.0441	0.0442	0.0442	0.0442	0.0441	0.044	0.044	0.044	0.044	0.044	0.0441	0.044	0.044	0.0439	0.0439	0.0439	0.0438	0.0438	0.0438	0.0439	0.0439	0.0439	0.044	0.044	0.044	0.044	0.044	0.0441	0.0441	0.0441	0.0441	0.0441	0.0441	0.0442	0.0444	0.0445	0.0446	0.0448	0.045	0.0451	0.0453	0.0455	0.0457	0.0459
	43	0.0439	0.044	0.0441	0.0442	0.0444	0.0444	0.0444	0.0443	0.0444	0.0444	0.0444	0.0444	0.0443	0.0443	0.0443	0.0442	0.0441	0.0441	0.044	0.044	0.044	0.0439	0.0439	0.0438	0.0438	0.0438	0.0438	0.0438	0.0438	0.0438	0.0438	0.0438	0.0438	0.0438	0.0438	0.0438	0.0438	0.0439	0.044	0.0441	0.0442	0.0444	0.0446	0.0447	0.0449	0.0452	0.0454	0.0456
	44	0.0387	0.0388	0.0388	0.0388	0.0388	0.0388	0.0388	0.0388	0.0388	0.0388	0.0388	0.0389	0.0389	0.0389	0.0389	0.0388	0.0388	0.0387	0.0387	0.0387	0.0388	0.0388	0.0388	0.0388	0.0388	0.0388	0.0388	0.0388	0.0389	0.039	0.0391	0.0391	0.0391	0.0391	0.0392	0.0393	0.0394	0.0394	0.0396	0.0397	0.0399	0.04	0.0403	0.0406	0.0409	0.0412	0.0415	0.0418
	45	0.0404	0.0404	0.0403	0.0403	0.0403	0.0403	0.0403	0.0404	0.0404	0.0404	0.0404	0.0404	0.0404	0.0404	0.0404	0.0404	0.0404	0.0404	0.0404	0.0403	0.0403	0.0403	0.0404	0.0404	0.0404	0.0405	0.0405	0.0405	0.0405	0.0405	0.0406	0.0407	0.0408	0.0408	0.0408	0.0408	0.0409	0.041	0.0411	0.0413	0.0415	0.0416	0.0419	0.0421	0.0424	0.0427	0.043	0.0433
	46	0.0401	0.0401	0.0401	0.0401	0.0401	0.0402	0.0402	0.0402	0.0402	0.0401	0.0401	0.0402	0.0402	0.0402	0.0401	0.0402	0.0401	0.0401	0.0401	0.04	0.04	0.04	0.0401	0.0401	0.0402	0.0402	0.0401	0.0402	0.0402	0.0403	0.0404	0.0404	0.0404	0.0404	0.0405	0.0405	0.0406	0.0407	0.0408	0.0409	0.0411	0.0412	0.0414	0.0417	0.0419	0.0421	0.0424	0.0427
	47	0.0405	0.0405	0.0406	0.0406	0.0406	0.0407	0.0406	0.0406	0.0405	0.0405	0.0406	0.0406	0.0406	0.0407	0.0407	0.0407	0.0406	0.0406	0.0406	0.0405	0.0405	0.0404	0.0405	0.0406	0.0407	0.0407	0.0408	0.0408	0.0409	0.0409	0.0409	0.041	0.041	0.041	0.0411	0.0412	0.0412	0.0413	0.0415	0.0416	0.0418	0.042	0.0422	0.0425	0.0428	0.043	0.0434	0.0437
	48	0.0419	0.042	0.042	0.0421	0.0421	0.0422	0.0422	0.0422	0.0422	0.0422	0.0422	0.0422	0.0422	0.0422	0.0423	0.0422	0.0422	0.0422	0.0422	0.0422	0.0422	0.0422	0.0422	0.0423	0.0423	0.0424	0.0425	0.0426	0.0426	0.0427	0.0428	0.0429	0.0431	0.0432	0.0433	0.0434	0.0435	0.0436	0.0438	0.0441	0.0444	0.0447	0.045	0.0455	0.0459	0.0464	0.0469	0.0474
	49	0.0486	0.0488	0.049	0.0491	0.0493	0.0493	0.0493	0.0493	0.0492	0.0493	0.0494	0.0495	0.0496	0.0496	0.0496	0.0496	0.0495	0.0495	0.0495	0.0494	0.0494	0.0493	0.0494	0.0495	0.0496	0.0496	0.0497	0.0498	0.0499	0.0499	0.05	0.0501	0.0502	0.0503	0.0504	0.0506	0.0508	0.051	0.0512	0.0515	0.0519	0.0522	0.0527	0.0531	0.0536	0.0541	0.0547	0.0553
	50	0.0392	0.0392	0.0392	0.0393	0.0393	0.0393	0.0393	0.0392	0.0391	0.0391	0.039	0.0391	0.0391	0.0391	0.0391	0.039	0.0389	0.0389	0.0389	0.0389	0.0388	0.0388	0.0388	0.0388	0.0389	0.0389	0.0389	0.0389	0.039	0.039	0.039	0.039	0.039	0.0389	0.0389	0.0389	0.039	0.039	0.0391	0.0392	0.0392	0.0393	0.0395	0.0397	0.0398	0.04	0.0402	0.0403
	51	0.0409	0.041	0.0411	0.0411	0.0411	0.0411	0.041	0.0409	0.0409	0.041	0.041	0.0409	0.0409	0.0408	0.0408	0.0409	0.0409	0.0409	0.0408	0.0408	0.0408	0.0408	0.0408	0.0407	0.0407	0.0408	0.0408	0.0409	0.0408	0.0409	0.0409	0.041	0.041	0.041	0.041	0.041	0.041	0.041	0.0411	0.0412	0.0413	0.0415	0.0416	0.0418	0.042	0.0421	0.0423	0.0425
	52	0.0393	0.0395	0.0396	0.0396	0.0397	0.0397	0.0397	0.0397	0.0397	0.0397	0.0397	0.0398	0.0399	0.04	0.04	0.04	0.04	0.0399	0.0398	0.0397	0.0397	0.0398	0.0399	0.04	0.0401	0.0402	0.0402	0.0403	0.0404	0.0405	0.0406	0.0408	0.0409	0.041	0.0411	0.0412	0.0415	0.0418	0.0421	0.0424	0.0427	0.0431	0.0436	0.0441	0.0446	0.0452	0.0459	0.0465
	53	0.0394	0.0395	0.0396	0.0398	0.0399	0.0399	0.0399	0.0398	0.0398	0.0398	0.0399	0.04	0.04	0.04	0.0399	0.04	0.04	0.04	0.0399	0.0399	0.0399	0.0399	0.0399	0.0399	0.04	0.0401	0.0402	0.0402	0.0403	0.0404	0.0404	0.0406	0.0407	0.0408	0.0408	0.0409	0.041	0.0411	0.0413	0.0416	0.0419	0.0423	0.0427	0.0431	0.0435	0.0439	0.0445	0.045
	54	0.041	0.0412	0.0413	0.0413	0.0413	0.0413	0.0414	0.0415	0.0415	0.0414	0.0414	0.0415	0.0415	0.0415	0.0415	0.0415	0.0415	0.0415	0.0415	0.0415	0.0415	0.0415	0.0414	0.0414	0.0415	0.0416	0.0417	0.0418	0.042	0.042	0.0421	0.0422	0.0423	0.0424	0.0425	0.0426	0.0427	0.0428	0.043	0.0433	0.0437	0.0441	0.0445	0.045	0.0454	0.0459	0.0465	0.0471
	55	0.0413	0.0415	0.0415	0.0414	0.0414	0.0413	0.0413	0.0413	0.0413	0.0413	0.0413	0.0412	0.0413	0.0413	0.0414	0.0413	0.0413	0.0412	0.0411	0.041	0.041	0.041	0.0412	0.0412	0.0413	0.0413	0.0413	0.0413	0.0414	0.0415	0.0416	0.0416	0.0416	0.0417	0.0417	0.0417	0.0418	0.0418	0.042	0.0421	0.0423	0.0425	0.0428	0.0431	0.0434	0.0438	0.0441	0.0444
	56	0.0411	0.0411	0.0413	0.0414	0.0415	0.0416	0.0415	0.0414	0.0413	0.0412	0.0413	0.0414	0.0415	0.0415	0.0414	0.0414	0.0413	0.0413	0.0414	0.0413	0.0413	0.0412	0.0413	0.0414	0.0415	0.0414	0.0415	0.0415	0.0416	0.0416	0.0417	0.0417	0.0418	0.0419	0.0421	0.0422	0.0423	0.0424	0.0424	0.0425	0.0428	0.043	0.0434	0.0439	0.0443	0.0446	0.045	0.0454
	57	0.0396	0.0396	0.0397	0.0397	0.0397	0.0396	0.0396	0.0396	0.0396	0.0397	0.0397	0.0396	0.0395	0.0395	0.0395	0.0396	0.0396	0.0396	0.0395	0.0395	0.0395	0.0395	0.0396	0.0397	0.0397	0.0397	0.0397	0.0397	0.0398	0.0399	0.04	0.0401	0.0401	0.0401	0.0401	0.0401	0.0401	0.0402	0.0403	0.0404	0.0405	0.0407	0.0409	0.0412	0.0415	0.0418	0.0421	0.0424
	58	0.0356	0.0357	0.0356	0.0356	0.0356	0.0355	0.0355	0.0354	0.0355	0.0355	0.0355	0.0355	0.0355	0.0355	0.0355	0.0355	0.0354	0.0354	0.0353	0.0353	0.0353	0.0353	0.0354	0.0354	0.0354	0.0354	0.0354	0.0354	0.0354	0.0355	0.0356	0.0356	0.0357	0.0357	0.0357	0.0357	0.0357	0.0357	0.0358	0.0358	0.036	0.0361	0.0363	0.0364	0.0367	0.0369	0.0371	0.0373
	59	0.0409	0.0411	0.0412	0.0413	0.0414	0.0414	0.0414	0.0414	0.0413	0.0414	0.0414	0.0415	0.0415	0.0415	0.0417	0.0417	0.0416	0.0416	0.0415	0.0414	0.0414	0.0413	0.0414	0.0415	0.0417	0.0418	0.0419	0.042	0.0421	0.0422	0.0424	0.0427	0.0428	0.0428	0.0428	0.0429	0.0431	0.0433	0.0436	0.0439	0.0443	0.0447	0.0453	0.0458	0.0463	0.047	0.0477	0.0485
	60	0.0383	0.0384	0.0384	0.0383	0.0382	0.0382	0.0382	0.0382	0.0383	0.0382	0.0382	0.0382	0.0382	0.0382	0.0382	0.0381	0.0381	0.0381	0.038	0.0379	0.0379	0.0379	0.0379	0.038	0.038	0.038	0.038	0.038	0.038	0.038	0.038	0.0381	0.0382	0.0383	0.0383	0.0383	0.0382	0.0382	0.0382	0.0383	0.0384	0.0386	0.0388	0.039	0.0392	0.0394	0.0396	0.0397
	61	0.043	0.043	0.0431	0.0431	0.043	0.043	0.0429	0.0428	0.0429	0.043	0.0431	0.043	0.0429	0.0428	0.0428	0.0428	0.0427	0.0426	0.0427	0.0426	0.0426	0.0427	0.0426	0.0425	0.0425	0.0425	0.0424	0.0424	0.0424	0.0424	0.0425	0.0426	0.0425	0.0425	0.0425	0.0426	0.0425	0.0425	0.0425	0.0425	0.0425	0.0426	0.0427	0.0429	0.0431	0.0432	0.0433	0.0434
	62	0.0377	0.0377	0.0378	0.0378	0.0377	0.0377	0.0377	0.0377	0.0376	0.0376	0.0376	0.0376	0.0376	0.0376	0.0376	0.0376	0.0376	0.0375	0.0375	0.0374	0.0374	0.0373	0.0373	0.0373	0.0373	0.0372	0.0372	0.0371	0.0371	0.0371	0.0372	0.0372	0.0372	0.0372	0.0372	0.0371	0.0371	0.0371	0.0371	0.0372	0.0373	0.0374	0.0376	0.0377	0.0378	0.0379	0.0381	0.0382
	63	0.036	0.0361	0.0361	0.0361	0.036	0.036	0.036	0.036	0.0361	0.0361	0.0361	0.036	0.036	0.0359	0.0359	0.0359	0.0358	0.0358	0.0358	0.0358	0.0358	0.0357	0.0357	0.0357	0.0356	0.0355	0.0355	0.0355	0.0354	0.0355	0.0355	0.0356	0.0357	0.0357	0.0357	0.0356	0.0356	0.0356	0.0357	0.0357	0.0358	0.0359	0.036	0.0361	0.0363	0.0365	0.0366	0.0367
	64	0.041	0.0411	0.0411	0.0411	0.0411	0.041	0.041	0.041	0.041	0.0409	0.0409	0.0408	0.0408	0.0408	0.0408	0.0409	0.0409	0.0409	0.0407	0.0406	0.0406	0.0406	0.0406	0.0407	0.0408	0.0407	0.0406	0.0405	0.0406	0.0407	0.0407	0.0408	0.0409	0.0409	0.041	0.041	0.041	0.041	0.041	0.0411	0.0412	0.0413	0.0415	0.0418	0.042	0.0423	0.0425	0.0426
	65	0.0438	0.044	0.0441	0.0443	0.0444	0.0445	0.0445	0.0444	0.0443	0.0442	0.0442	0.0443	0.0443	0.0443	0.0443	0.0442	0.0442	0.0442	0.0441	0.0441	0.0441	0.044	0.044	0.0439	0.0438	0.0438	0.0438	0.0438	0.0439	0.044	0.044	0.0441	0.0442	0.0442	0.0443	0.0443	0.0443	0.0444	0.0445	0.0446	0.0448	0.0451	0.0455	0.0458	0.0461	0.0463	0.0466	0.0469
	66	0.0414	0.0416	0.0417	0.0418	0.0418	0.0417	0.0417	0.0416	0.0417	0.0417	0.0417	0.0418	0.0418	0.0418	0.0419	0.0419	0.0419	0.0418	0.0418	0.0418	0.0418	0.0418	0.0418	0.0418	0.0419	0.0419	0.042	0.042	0.0421	0.0423	0.0424	0.0426	0.0427	0.0428	0.0429	0.043	0.0432	0.0433	0.0435	0.0438	0.0441	0.0445	0.045	0.0455	0.0461	0.0466	0.0472	0.0478
	67	0.0422	0.0423	0.0424	0.0424	0.0424	0.0423	0.0422	0.0422	0.0422	0.0421	0.0421	0.0421	0.0421	0.0421	0.042	0.0421	0.0421	0.0421	0.0421	0.0421	0.042	0.0419	0.0419	0.0419	0.0419	0.0419	0.0419	0.042	0.0419	0.042	0.0421	0.0422	0.0423	0.0423	0.0424	0.0424	0.0424	0.0424	0.0424	0.0426	0.0427	0.0429	0.0432	0.0435	0.0438	0.0441	0.0443	0.0445
	68	0.0375	0.0376	0.0377	0.0377	0.0378	0.0377	0.0377	0.0376	0.0375	0.0376	0.0376	0.0376	0.0375	0.0375	0.0375	0.0375	0.0376	0.0376	0.0375	0.0375	0.0375	0.0375	0.0374	0.0374	0.0375	0.0375	0.0376	0.0376	0.0377	0.0378	0.0379	0.038	0.0381	0.0381	0.0382	0.0382	0.0382	0.0382	0.0382	0.0384	0.0386	0.0389	0.0392	0.0395	0.0398	0.0401	0.0405	0.0408
	69	0.0362	0.0364	0.0365	0.0366	0.0365	0.0364	0.0363	0.0362	0.0363	0.0363	0.0363	0.0363	0.0362	0.0361	0.0361	0.0362	0.0363	0.0362	0.0361	0.036	0.036	0.036	0.036	0.036	0.036	0.0359	0.0359	0.0358	0.0359	0.036	0.0361	0.0362	0.0363	0.0364	0.0363	0.0362	0.0361	0.0361	0.0361	0.0362	0.0363	0.0365	0.0367	0.0369	0.0371	0.0375	0.0377	0.0379
	70	0.0419	0.0421	0.0422	0.0423	0.0423	0.0421	0.0419	0.0419	0.0418	0.0417	0.0416	0.0417	0.0416	0.0416	0.0417	0.0417	0.0417	0.0417	0.0416	0.0416	0.0416	0.0415	0.0415	0.0415	0.0415	0.0414	0.0414	0.0414	0.0414	0.0416	0.0417	0.0419	0.0419	0.0419	0.0419	0.0419	0.0419	0.0419	0.0419	0.042	0.0421	0.0423	0.0426	0.0428	0.0431	0.0435	0.0437	0.0439
	71	0.0408	0.041	0.0411	0.0412	0.0412	0.041	0.0409	0.0408	0.0408	0.0408	0.0408	0.0408	0.0408	0.0409	0.0409	0.0409	0.0409	0.0409	0.0408	0.0407	0.0406	0.0406	0.0406	0.0406	0.0407	0.0407	0.0407	0.0407	0.0407	0.0409	0.0411	0.0413	0.0414	0.0414	0.0414	0.0413	0.0413	0.0413	0.0413	0.0415	0.0417	0.042	0.0423	0.0427	0.0431	0.0434	0.0438	0.0441
	72	0.0375	0.0376	0.0377	0.0377	0.0376	0.0376	0.0376	0.0376	0.0375	0.0374	0.0373	0.0373	0.0373	0.0374	0.0374	0.0375	0.0376	0.0376	0.0375	0.0374	0.0373	0.0373	0.0374	0.0374	0.0374	0.0373	0.0373	0.0373	0.0374	0.0376	0.0378	0.038	0.0381	0.0381	0.0382	0.0381	0.0381	0.0381	0.0382	0.0383	0.0385	0.0388	0.0391	0.0395	0.0399	0.0403	0.0407	0.041
	73	0.0494	0.0499	0.0504	0.0506	0.0507	0.0509	0.051	0.051	0.0509	0.0509	0.0509	0.0509	0.0509	0.051	0.0511	0.0513	0.0513	0.0513	0.0513	0.0512	0.0512	0.0512	0.0512	0.0513	0.0514	0.0514	0.0516	0.0518	0.0521	0.0526	0.053	0.0536	0.054	0.0544	0.0546	0.0548	0.055	0.0552	0.0557	0.0564	0.0572	0.0582	0.0595	0.0608	0.0621	0.0636	0.065	0.0664
	74	0.0447	0.0451	0.0452	0.0453	0.0454	0.0454	0.0454	0.0453	0.0453	0.0452	0.0452	0.0452	0.0452	0.0453	0.0454	0.0454	0.0455	0.0455	0.0453	0.0452	0.0452	0.0452	0.0452	0.0453	0.0453	0.0453	0.0453	0.0453	0.0454	0.0456	0.046	0.0464	0.0467	0.0468	0.0468	0.0468	0.0468	0.0469	0.0471	0.0474	0.0478	0.0482	0.0489	0.0496	0.0503	0.0511	0.0519	0.0526
	75	0.0391	0.0394	0.0394	0.0394	0.0393	0.0392	0.0391	0.039	0.0391	0.0391	0.0391	0.0391	0.039	0.039	0.0391	0.0391	0.0392	0.0392	0.0392	0.0391	0.039	0.0391	0.039	0.039	0.039	0.039	0.039	0.0389	0.039	0.0392	0.0395	0.0398	0.04	0.04	0.04	0.0399	0.0399	0.0399	0.04	0.0401	0.0404	0.0407	0.0411	0.0416	0.042	0.0425	0.043	0.0434
	76	0.0431	0.0434	0.0434	0.0434	0.0434	0.0433	0.0432	0.0431	0.043	0.0429	0.0428	0.0428	0.0428	0.0429	0.043	0.0431	0.0431	0.043	0.0429	0.0429	0.0429	0.0429	0.0428	0.0428	0.0428	0.0428	0.0429	0.0429	0.043	0.0432	0.0434	0.0438	0.0439	0.0439	0.0439	0.0438	0.0437	0.0437	0.0437	0.044	0.0443	0.0446	0.0451	0.0456	0.046	0.0466	0.0471	0.0475
	77	0.0408	0.041	0.0412	0.0412	0.0412	0.0411	0.0409	0.0408	0.0408	0.0407	0.0406	0.0406	0.0406	0.0407	0.0408	0.0409	0.0408	0.0408	0.0407	0.0407	0.0407	0.0407	0.0407	0.0407	0.0407	0.0406	0.0405	0.0405	0.0407	0.0409	0.0412	0.0416	0.0417	0.0417	0.0417	0.0416	0.0414	0.0414	0.0414	0.0416	0.0419	0.0422	0.0426	0.043	0.0435	0.0439	0.0444	0.0447
	78	0.0376	0.0378	0.0379	0.0379	0.0378	0.0377	0.0376	0.0374	0.0373	0.0373	0.0373	0.0373	0.0373	0.0374	0.0374	0.0374	0.0374	0.0373	0.0372	0.0372	0.0371	0.0371	0.037	0.037	0.0369	0.0368	0.0367	0.0366	0.0366	0.0366	0.0367	0.0369	0.037	0.037	0.037	0.0369	0.0368	0.0367	0.0366	0.0366	0.0366	0.0367	0.0369	0.0372	0.0374	0.0375	0.0376	0.0376
	79	0.037	0.0372	0.0373	0.0374	0.0374	0.0373	0.0372	0.0372	0.0372	0.0372	0.0372	0.0371	0.0371	0.0372	0.0373	0.0374	0.0374	0.0374	0.0373	0.0372	0.0372	0.0372	0.0372	0.0372	0.0371	0.037	0.0369	0.0368	0.0368	0.037	0.0373	0.0377	0.0378	0.0378	0.0378	0.0378	0.0378	0.0378	0.0379	0.0381	0.0383	0.0386	0.039	0.0395	0.04	0.0404	0.0408	0.0411
	80	0.0362	0.0365	0.0366	0.0366	0.0365	0.0363	0.0362	0.0361	0.0361	0.036	0.036	0.0361	0.036	0.036	0.0362	0.0363	0.0363	0.0362	0.0361	0.036	0.036	0.0359	0.0359	0.036	0.036	0.0359	0.0358	0.0358	0.0358	0.036	0.0363	0.0365	0.0366	0.0366	0.0366	0.0365	0.0364	0.0364	0.0364	0.0365	0.0366	0.0368	0.0371	0.0375	0.0379	0.0382	0.0385	0.0387
	81	0.036	0.0362	0.0363	0.0363	0.0363	0.0361	0.036	0.0359	0.0358	0.0357	0.0356	0.0356	0.0357	0.0358	0.0359	0.036	0.036	0.0359	0.0358	0.0358	0.0357	0.0356	0.0357	0.0357	0.0356	0.0356	0.0356	0.0355	0.0356	0.0357	0.0359	0.0362	0.0362	0.0363	0.0363	0.0362	0.0361	0.0361	0.0361	0.0362	0.0364	0.0366	0.0369	0.0372	0.0375	0.0379	0.0381	0.0384
	82	0.0364	0.0367	0.0369	0.0369	0.0368	0.0367	0.0365	0.0364	0.0364	0.0363	0.0363	0.0363	0.0363	0.0364	0.0365	0.0366	0.0366	0.0365	0.0365	0.0364	0.0364	0.0364	0.0364	0.0364	0.0364	0.0363	0.0362	0.0363	0.0364	0.0366	0.0369	0.0372	0.0374	0.0375	0.0375	0.0374	0.0374	0.0374	0.0375	0.0377	0.038	0.0383	0.0388	0.0393	0.0397	0.0402	0.0406	0.041
	83	0.0405	0.0407	0.0409	0.041	0.041	0.0408	0.0407	0.0406	0.0405	0.0403	0.0402	0.0402	0.0403	0.0404	0.0404	0.0406	0.0406	0.0406	0.0406	0.0405	0.0404	0.0403	0.0403	0.0403	0.0403	0.0402	0.0402	0.0402	0.0403	0.0405	0.0408	0.0411	0.0414	0.0415	0.0415	0.0415	0.0414	0.0413	0.0414	0.0417	0.042	0.0425	0.043	0.0435	0.0441	0.0446	0.0452	0.0457
	84	0.0362	0.0362	0.0362	0.0363	0.0364	0.0364	0.0364	0.0364	0.0364	0.0364	0.0365	0.0365	0.0365	0.0365	0.0365	0.0364	0.0364	0.0364	0.0363	0.0363	0.0363	0.0364	0.0364	0.0365	0.0365	0.0366	0.0367	0.0368	0.0369	0.037	0.037	0.037	0.037	0.0371	0.0373	0.0375	0.0376	0.0377	0.0379	0.0381	0.0384	0.0387	0.0391	0.0395	0.0399	0.0403	0.0408	0.0413
	85	0.0388	0.0388	0.0388	0.0388	0.0389	0.039	0.0391	0.0392	0.0392	0.0392	0.0391	0.0391	0.039	0.039	0.0389	0.0389	0.0389	0.0389	0.0389	0.039	0.0391	0.0391	0.039	0.0391	0.0391	0.0391	0.0392	0.0394	0.0395	0.0396	0.0397	0.0398	0.0399	0.04	0.04	0.0401	0.0402	0.0403	0.0406	0.0409	0.0412	0.0416	0.042	0.0425	0.0429	0.0434	0.0438	0.0444
	86	0.0378	0.0381	0.0382	0.0384	0.0386	0.0386	0.0387	0.0389	0.039	0.0391	0.0391	0.0391	0.0391	0.0391	0.0391	0.0391	0.0391	0.0391	0.039	0.0389	0.0389	0.039	0.0391	0.0393	0.0394	0.0395	0.0396	0.0397	0.0399	0.0401	0.0403	0.0405	0.0406	0.0408	0.0409	0.0411	0.0414	0.0418	0.0422	0.0427	0.0432	0.0439	0.0444	0.0452	0.046	0.0468	0.0477	0.0486
	87	0.0322	0.0323	0.0323	0.0323	0.0323	0.0324	0.0324	0.0324	0.0325	0.0325	0.0325	0.0325	0.0326	0.0325	0.0325	0.0324	0.0324	0.0324	0.0324	0.0323	0.0323	0.0324	0.0323	0.0324	0.0325	0.0325	0.0326	0.0327	0.0329	0.033	0.033	0.033	0.033	0.033	0.0331	0.0333	0.0334	0.0335	0.0337	0.0339	0.0341	0.0344	0.0347	0.0351	0.0355	0.0359	0.0363	0.0367
	88	0.0425	0.0427	0.0429	0.043	0.043	0.043	0.0431	0.0431	0.0432	0.0432	0.0433	0.0434	0.0434	0.0434	0.0434	0.0435	0.0435	0.0434	0.0433	0.0433	0.0433	0.0434	0.0435	0.0437	0.0438	0.044	0.0441	0.0442	0.0444	0.0446	0.0447	0.0449	0.0451	0.0453	0.0455	0.0457	0.0461	0.0464	0.0468	0.0474	0.0479	0.0485	0.0492	0.0499	0.0507	0.0514	0.0523	0.0531
	89	0.0361	0.0362	0.0363	0.0363	0.0362	0.0362	0.0362	0.0362	0.0363	0.0363	0.0363	0.0363	0.0363	0.0363	0.0363	0.0363	0.0363	0.0362	0.0363	0.0363	0.0363	0.0362	0.0363	0.0364	0.0365	0.0366	0.0367	0.0369	0.037	0.0371	0.0371	0.0372	0.0373	0.0374	0.0375	0.0377	0.0378	0.038	0.0383	0.0386	0.039	0.0394	0.0398	0.0403	0.0407	0.0412	0.0419	0.0425
	90	0.0407	0.0407	0.0408	0.0408	0.0408	0.0408	0.0407	0.0407	0.0407	0.0407	0.0407	0.0407	0.0407	0.0407	0.0407	0.0406	0.0405	0.0405	0.0404	0.0404	0.0404	0.0404	0.0404	0.0404	0.0404	0.0405	0.0405	0.0405	0.0405	0.0405	0.0406	0.0406	0.0406	0.0406	0.0406	0.0406	0.0407	0.0408	0.0409	0.041	0.0411	0.0412	0.0414	0.0416	0.0419	0.0421	0.0424	0.0427
	91	0.0383	0.0383	0.0384	0.0384	0.0385	0.0385	0.0385	0.0385	0.0385	0.0385	0.0385	0.0386	0.0385	0.0384	0.0384	0.0384	0.0384	0.0384	0.0383	0.0383	0.0383	0.0382	0.0382	0.0382	0.0382	0.0382	0.0381	0.0381	0.0381	0.0382	0.0382	0.0382	0.0382	0.0382	0.0382	0.0382	0.0383	0.0383	0.0384	0.0385	0.0386	0.0388	0.039	0.0392	0.0394	0.0396	0.0399	0.0402
	92	0.0378	0.0379	0.0379	0.038	0.0379	0.0379	0.0379	0.0378	0.0378	0.0378	0.0378	0.0378	0.0378	0.0377	0.0377	0.0376	0.0376	0.0376	0.0376	0.0375	0.0375	0.0375	0.0375	0.0375	0.0375	0.0375	0.0376	0.0376	0.0376	0.0376	0.0376	0.0376	0.0375	0.0376	0.0376	0.0376	0.0376	0.0376	0.0377	0.0377	0.0378	0.038	0.0381	0.0382	0.0384	0.0385	0.0387	0.0389
	93	0.0374	0.0374	0.0374	0.0375	0.0375	0.0375	0.0375	0.0375	0.0375	0.0375	0.0375	0.0374	0.0374	0.0373	0.0372	0.0372	0.0372	0.0372	0.0372	0.0372	0.0372	0.0372	0.0372	0.0372	0.0372	0.0373	0.0373	0.0373	0.0373	0.0373	0.0374	0.0374	0.0374	0.0374	0.0374	0.0374	0.0374	0.0374	0.0375	0.0376	0.0377	0.0378	0.0379	0.0381	0.0383	0.0384	0.0386	0.0388
	94	0.0384	0.0384	0.0384	0.0385	0.0385	0.0385	0.0385	0.0385	0.0385	0.0385	0.0385	0.0385	0.0384	0.0384	0.0384	0.0383	0.0383	0.0383	0.0382	0.0382	0.0381	0.0381	0.038	0.038	0.038	0.038	0.038	0.038	0.038	0.038	0.038	0.038	0.0379	0.0379	0.0379	0.0379	0.0379	0.038	0.038	0.0381	0.0382	0.0383	0.0384	0.0386	0.0387	0.0388	0.039	0.0392
	95	0.0419	0.042	0.042	0.042	0.042	0.0419	0.0419	0.0419	0.042	0.0419	0.0419	0.0418	0.0418	0.0418	0.0418	0.0418	0.0417	0.0417	0.0416	0.0416	0.0416	0.0416	0.0416	0.0416	0.0416	0.0416	0.0416	0.0416	0.0417	0.0417	0.0417	0.0418	0.0418	0.0417	0.0417	0.0417	0.0418	0.0419	0.042	0.0421	0.0422	0.0423	0.0425	0.0427	0.0429	0.0431	0.0433	0.0436
	96	0.039	0.0391	0.0392	0.0392	0.0393	0.0394	0.0395	0.0396	0.0397	0.0397	0.0397	0.0397	0.0397	0.0397	0.0398	0.0398	0.0398	0.0398	0.0397	0.0396	0.0396	0.0396	0.0396	0.0396	0.0396	0.0396	0.0397	0.0397	0.0398	0.0398	0.0399	0.04	0.04	0.0401	0.0401	0.0402	0.0404	0.0405	0.0407	0.0409	0.0413	0.0417	0.0421	0.0425	0.0429	0.0435	0.044	0.0446
	97	0.0431	0.0432	0.0432	0.0433	0.0434	0.0434	0.0435	0.0435	0.0435	0.0435	0.0436	0.0437	0.0437	0.0437	0.0436	0.0436	0.0435	0.0434	0.0433	0.0433	0.0432	0.0432	0.0432	0.0431	0.0432	0.0431	0.043	0.043	0.043	0.0429	0.0429	0.0429	0.0429	0.0429	0.0429	0.043	0.043	0.0431	0.0432	0.0433	0.0434	0.0436	0.0438	0.0441	0.0444	0.0446	0.045	0.0453
	98	0.0378	0.0379	0.0379	0.0378	0.0378	0.0377	0.0377	0.0377	0.0377	0.0376	0.0376	0.0376	0.0376	0.0376	0.0375	0.0374	0.0374	0.0373	0.0373	0.0373	0.0373	0.0372	0.0372	0.0372	0.0372	0.0372	0.0372	0.0371	0.0371	0.0371	0.0371	0.037	0.037	0.037	0.0369	0.0369	0.0369	0.0369	0.037	0.037	0.037	0.037	0.037	0.0371	0.0372	0.0373	0.0373	0.0374
	99	0.0388	0.0388	0.0388	0.0388	0.0387	0.0386	0.0387	0.0387	0.0387	0.0387	0.0386	0.0385	0.0385	0.0384	0.0385	0.0384	0.0384	0.0383	0.0383	0.0382	0.0382	0.0382	0.0382	0.0382	0.0382	0.0381	0.0381	0.0381	0.0381	0.0381	0.038	0.038	0.038	0.038	0.0379	0.0379	0.0378	0.0378	0.0378	0.0379	0.0379	0.038	0.038	0.038	0.0381	0.0382	0.0383	0.0384
	100	0.037	0.0371	0.0371	0.0371	0.0371	0.037	0.037	0.0371	0.037	0.037	0.037	0.0369	0.0369	0.0369	0.0368	0.0368	0.0368	0.0368	0.0367	0.0367	0.0367	0.0366	0.0366	0.0366	0.0366	0.0366	0.0366	0.0366	0.0367	0.0367	0.0366	0.0367	0.0367	0.0367	0.0366	0.0366	0.0366	0.0366	0.0366	0.0366	0.0367	0.0368	0.0369	0.037	0.0372	0.0373	0.0374	0.0376
	101	0.0387	0.0388	0.0388	0.0388	0.0388	0.0388	0.0387	0.0387	0.0387	0.0387	0.0387	0.0387	0.0387	0.0386	0.0386	0.0386	0.0385	0.0385	0.0384	0.0383	0.0383	0.0384	0.0384	0.0383	0.0383	0.0383	0.0382	0.0382	0.0382	0.0383	0.0383	0.0384	0.0384	0.0384	0.0384	0.0384	0.0384	0.0384	0.0384	0.0385	0.0386	0.0387	0.0388	0.039	0.0392	0.0394	0.0397	0.0399
	102	0.0381	0.0382	0.0383	0.0384	0.0384	0.0383	0.0382	0.0382	0.0382	0.0382	0.0382	0.0382	0.0382	0.0381	0.038	0.038	0.038	0.038	0.0379	0.0379	0.0378	0.0378	0.0377	0.0377	0.0377	0.0378	0.0378	0.0378	0.0377	0.0377	0.0377	0.0377	0.0378	0.0378	0.0378	0.0377	0.0377	0.0377	0.0377	0.0378	0.0379	0.038	0.0381	0.0382	0.0383	0.0385	0.0387	0.0389
	103	0.0377	0.0378	0.0378	0.0378	0.0378	0.0378	0.0379	0.0378	0.0377	0.0377	0.0376	0.0376	0.0376	0.0376	0.0376	0.0376	0.0376	0.0375	0.0375	0.0374	0.0373	0.0372	0.0372	0.0372	0.0372	0.0372	0.0372	0.0371	0.037	0.037	0.037	0.037	0.037	0.037	0.037	0.0369	0.0369	0.0369	0.0369	0.037	0.037	0.0371	0.0372	0.0372	0.0373	0.0375	0.0376	0.0377
	104	0.0366	0.0367	0.0367	0.0367	0.0367	0.0367	0.0367	0.0366	0.0365	0.0365	0.0364	0.0364	0.0364	0.0363	0.0364	0.0364	0.0364	0.0363	0.0362	0.0361	0.0361	0.036	0.036	0.036	0.036	0.036	0.036	0.0359	0.0359	0.0359	0.0359	0.0359	0.0359	0.0358	0.0358	0.0358	0.0358	0.0357	0.0357	0.0357	0.0358	0.0358	0.0358	0.0359	0.0359	0.036	0.0361	0.0362
	105	0.0372	0.0373	0.0374	0.0374	0.0373	0.0373	0.0372	0.0372	0.0371	0.0371	0.0371	0.037	0.037	0.037	0.0369	0.0369	0.0369	0.0369	0.0368	0.0368	0.0367	0.0367	0.0367	0.0367	0.0367	0.0367	0.0366	0.0366	0.0365	0.0365	0.0365	0.0366	0.0366	0.0365	0.0365	0.0364	0.0364	0.0364	0.0364	0.0364	0.0364	0.0364	0.0365	0.0365	0.0366	0.0367	0.0368	0.0369
	106	0.0376	0.0376	0.0376	0.0377	0.0377	0.0378	0.0377	0.0377	0.0376	0.0375	0.0374	0.0373	0.0373	0.0373	0.0374	0.0373	0.0373	0.0373	0.0373	0.0372	0.0371	0.037	0.037	0.0369	0.0369	0.0369	0.0368	0.0368	0.0369	0.0369	0.0369	0.0368	0.0368	0.0367	0.0366	0.0366	0.0366	0.0366	0.0366	0.0366	0.0366	0.0366	0.0367	0.0367	0.0367	0.0368	0.0368	0.0369
	107	0.0382	0.0383	0.0384	0.0385	0.0385	0.0385	0.0384	0.0384	0.0383	0.0383	0.0383	0.0382	0.0381	0.0381	0.0381	0.0381	0.0381	0.0381	0.0381	0.038	0.038	0.0379	0.0379	0.0379	0.0379	0.0379	0.0379	0.0379	0.0378	0.0379	0.0379	0.0379	0.0379	0.0379	0.0378	0.0379	0.0379	0.0379	0.038	0.038	0.0381	0.0382	0.0383	0.0385	0.0386	0.0388	0.039	0.0392
	108	0.0377	0.0378	0.0379	0.038	0.0379	0.0379	0.0378	0.0378	0.0378	0.0378	0.0379	0.0378	0.0378	0.0378	0.0377	0.0377	0.0377	0.0376	0.0376	0.0375	0.0375	0.0375	0.0374	0.0374	0.0374	0.0374	0.0374	0.0373	0.0373	0.0373	0.0373	0.0374	0.0374	0.0375	0.0375	0.0375	0.0374	0.0373	0.0374	0.0375	0.0376	0.0377	0.0378	0.0379	0.0381	0.0383	0.0385	0.0387
	109	0.0361	0.0361	0.0362	0.0362	0.0362	0.0362	0.0362	0.0362	0.0362	0.0361	0.0361	0.036	0.036	0.036	0.0359	0.0359	0.0359	0.0359	0.0359	0.0358	0.0358	0.0357	0.0357	0.0357	0.0357	0.0357	0.0356	0.0355	0.0355	0.0355	0.0355	0.0355	0.0356	0.0356	0.0356	0.0355	0.0355	0.0354	0.0354	0.0354	0.0355	0.0355	0.0356	0.0356	0.0357	0.0358	0.0359	0.0361
	110	0.0389	0.039	0.0391	0.0391	0.0391	0.0391	0.0391	0.039	0.0391	0.0391	0.0391	0.039	0.039	0.0389	0.0388	0.0388	0.0389	0.0389	0.0388	0.0387	0.0387	0.0387	0.0387	0.0386	0.0386	0.0386	0.0386	0.0386	0.0386	0.0386	0.0386	0.0387	0.0387	0.0388	0.0388	0.0387	0.0387	0.0387	0.0388	0.0388	0.039	0.0391	0.0393	0.0395	0.0398	0.04	0.0402	0.0405
	111	0.0381	0.0381	0.0381	0.0382	0.0382	0.0381	0.0381	0.0381	0.038	0.038	0.038	0.038	0.038	0.0379	0.0378	0.0378	0.0378	0.0378	0.0377	0.0377	0.0377	0.0376	0.0377	0.0377	0.0377	0.0377	0.0376	0.0376	0.0376	0.0376	0.0376	0.0376	0.0377	0.0377	0.0377	0.0377	0.0377	0.0377	0.0377	0.0377	0.0377	0.0378	0.038	0.0381	0.0383	0.0384	0.0386	0.0388
	112	0.035	0.0351	0.0352	0.0352	0.0352	0.0351	0.035	0.0349	0.0349	0.0349	0.0349	0.0349	0.0348	0.0347	0.0347	0.0347	0.0347	0.0347	0.0346	0.0345	0.0344	0.0344	0.0344	0.0344	0.0344	0.0345	0.0344	0.0343	0.0342	0.0342	0.0342	0.0342	0.0342	0.0342	0.0342	0.0342	0.0342	0.0341	0.0341	0.0341	0.034	0.034	0.0341	0.0341	0.0342	0.0343	0.0344	0.0345
	113	0.0365	0.0366	0.0367	0.0367	0.0367	0.0367	0.0367	0.0367	0.0366	0.0366	0.0366	0.0366	0.0366	0.0365	0.0365	0.0365	0.0365	0.0365	0.0364	0.0364	0.0364	0.0364	0.0364	0.0364	0.0364	0.0365	0.0365	0.0364	0.0364	0.0365	0.0365	0.0366	0.0367	0.0367	0.0367	0.0367	0.0367	0.0367	0.0367	0.0368	0.0369	0.037	0.0372	0.0373	0.0376	0.0378	0.0381	0.0383
	114	0.0391	0.0391	0.0392	0.0393	0.0392	0.0392	0.0392	0.0391	0.0391	0.0391	0.039	0.039	0.0389	0.0389	0.0388	0.0388	0.0388	0.0387	0.0386	0.0386	0.0385	0.0384	0.0384	0.0383	0.0383	0.0382	0.0382	0.0381	0.038	0.0379	0.0379	0.0379	0.0379	0.0378	0.0378	0.0377	0.0376	0.0376	0.0375	0.0375	0.0375	0.0375	0.0375	0.0376	0.0376	0.0377	0.0378	0.0378
[truncated: 104 more columns]
